# Supplementary material for: TRIM14 is a Putative Tumor Suppressor and Regulator of Innate Immune Response in Non-Small Cell Lung Cancer
Source: PubMed Central journal article supplement (PMC5216374; doi:10.1038/srep39692), 2017-01-06
Supplement: srep39692-s1.pdf [file srep39692-s1.pdf]

# **TRIM14 is a Putative Tumor Suppressor and Regulator of Innate Immune Response in Non-Small Cell Lung Cancer**

Josephine Hai<sup>1,2,3,4</sup>, Chang-Qi Zhu<sup>1</sup>, Tao Wang<sup>1</sup>, Shawna L Organ<sup>1</sup>, Frances A Shepherd<sup>1</sup> and Ming-Sound Tsao\*<sup>1,2</sup>

<sup>1</sup>Princess Margaret Cancer Centre, University Health Network, Toronto, ON, Canada

<sup>2</sup>Department of Medical Biophysics, University of Toronto, Toronto, ON, Canada

<sup>3</sup>Department of Medical Oncology, Dana-Farber Cancer Institute, Boston, MA, USA

<sup>4</sup>Department of Medicine, Harvard Medical School, Boston, MA, USA

Supplemental Methods

Supplemental Tables 1-6

Supplemental Figures 1-8

## Supplemental Methods

### Quantitative real-time PCR analysis

Total cellular RNA was extracted from xenograft tumours and cell lines using TRIzol reagent (Invitrogen, Burlington, ON) and RNeasy Mini kit (Qiagen, Mississauga, ON), respectively. One microgram of total RNA was reverse transcribed using Superscript II RNase H reverse transcription kit (Invitrogen, Burlington, ON). Real-time qPCR was performed using 10ng of the first-strand cDNA synthesis as a template using Stratagene MX3000P (La Jolla, CA) and the SYBR Green technique. mRNA copy number for was adjusted by the geometric mean of the 3 house-keeping genes (*ACTB*, *BAT1* and *RPS13*) as previously described<sup>1</sup>. The following are the human specific primers used in this study:

|        |          |                            |
|--------|----------|----------------------------|
| ACTB   | Forward  | TCCTAAAAGCCACCCACTTCT      |
| ACTB   | Reverse  | GGGAGAGGACTGGGCCATT        |
| BAT1   | Forward  | TGCCTCGGCCAAATAGGTT        |
| BAT1   | Reverse  | CGGTATCAGCAGTTTAAAGATTTTCA |
| IFIT3  | Reverse  | CAGTTGTGTCCACCCTTCT        |
| IFIT3  | Forward  | GAACATGCTGACCAAGCAGA       |
| IFNB1  | Forward  | AGCAGTCTGCACCTGAAAAGATATT  |
| IFNB1  | Reverse  | TGTACTCCTTGGCCTTCAGGTAA    |
| ISG56  | Forward  | TTCGGAGAAAGGCATTAGA        |
| ISG56  | Reverse  | TCCAGGGCTTCATTCATAT        |
| OAS1   | Forward  | ACAGGCAGAAGAGGACTGGA       |
| OAS1   | Reverse  | TAGAAGGCCAGGAGTCAGGA       |
| P21    | Forward  | TGGGGATGTCCGTCAGAAC        |
| P21    | Reverse  | GGCGTTTGGAGTGGTAGAAATC     |
| RPS13  | Forward  | GTTGCTGTTTCGAAAGCATCTTG    |
| RPS13  | Reverse  | AATATCGAGCCAAACGGTGAA      |
| TRIM14 | Forward  | TCACAGCTCCCTCCAGAAGC       |
| TRIM14 | Reverse  | TTGGGAGAGGGTCAGGAGTAG      |
| TRIM14 | Forward2 | ACGGCCACCGAGCAGGAGAT       |
| TRIM14 | Reverse2 | GGCGTGCGCGGTATTTTCAG       |

### Scoring of shRNA pooled screen

To incorporate measurements from multiple time points in an shRNA screen, we used the shARP scoring as previously described by Marcotte *et al.*<sup>2</sup>. The shARP scores were determined for each of the hairpins in the library and used to subsequently calculate the GARP score by averaging the 2 lowest shARP scores. Rather than bootstrapping the small sample size of hairpins to assign significance, the GARP scores were used to rank genes to determine overall hairpin enrichment and depletion.

## Immunoprecipitation for liquid chromatography-tandem mass spectrometry (LC MS/MS) analysis

MS Data Analysis Tandem mass spectra were extracted by BioWorks version 3.3. All MS/MS samples were analyzed using SEQUEST (ThermoFinnigan, San Jose, CA; version 27, revision 12) and X! Tandem (The Global Proteome Machine Organization; version 2006.04.01.2). Both search engines were set up to search the Human Uniprot Database dated Sept 5 2012 and containing 86,582 protein sequences. Scaffold (Proteome Software Inc., Portland, OR; version Scaffold-01.06.05) was used to validate MS/MS-based peptide and protein identifications. Peptide identifications were accepted if they could be established at greater than 95.0% probability as specified by the Peptide Prophet algorithm<sup>3</sup>. Proteins that contained similar peptides and could not be differentiated based on MS/MS analysis alone were grouped to satisfy the principles of parsimony.

## Supplemental Tables:

**Supplemental Table 1. Target sequences and clone IDs per hairpin used in the RNAi screen**

|    | Gene Name | Gene Source ID | Target Seq             | TRC Clone ID   |
|----|-----------|----------------|------------------------|----------------|
| 1  | ATP1B1    | 481            | GCCGTACAGTTCACCAATCTT  | TRCN0000043333 |
| 2  | ATP1B2    | 481            | GCTCACCATCAGTGAATTTAA  | TRCN0000043334 |
| 3  | ATP1B3    | 481            | CCCAAGAGCTATGAGGCATAT  | TRCN0000043335 |
| 4  | ATP1B4    | 481            | GTGATGAAGTATAACCCAAAT  | TRCN0000043336 |
| 5  | ATP1B5    | 481            | CGGTGGCAGTTGGTTTAAAGAT | TRCN0000043337 |
| 6  | L1CAM-1   | 3897           | CCACTTGTTTAAGGAGAGGAT  | TRCN0000063913 |
| 7  | L1CAM-2   | 3897           | GCTAACCTGAAGTTAAAGAT   | TRCN0000063914 |
| 8  | L1CAM-3   | 3897           | CCTTTAGGGTTACTGCCATAA  | TRCN0000063915 |
| 9  | L1CAM-4   | 3897           | ACGGGCAACAACAGCAACTTT  | TRCN0000063916 |
| 10 | L1CAM-5   | 3897           | GCCAATGCCTACATCTACGTT  | TRCN0000063917 |
| 11 | HEXIM1    | 10614          | CCCTATTCTAAATCGCTTAA   | TRCN0000245065 |
| 12 | HEXIM2    | 10614          | GTTTGGGAGACTAGACTGAAAC | TRCN0000245064 |
| 13 | HEXIM3    | 10614          | GCGGCATTGGAAACCGTACTA  | TRCN0000245062 |
| 14 | HEXIM4    | 10614          | ACACCAGCGATGACGACTTCA  | TRCN0000245063 |
| 15 | HEXIM5    | 10614          | AGCCTCAAAGTAGCAACTGTA  | TRCN0000245061 |
| 16 | MDM1      | 4193           | CTTTGGTAGTGGAATAGTGAA  | TRCN0000003376 |
| 17 | MDM2      | 4193           | GATTCCAGAGAGTCATGTGTT  | TRCN0000003377 |
| 18 | MDM3      | 4193           | CGATTATATGATGAGAAGCAA  | TRCN0000003378 |
| 19 | MDM4      | 4193           | CTGTGTGTAATAAGGGAGATA  | TRCN0000003379 |
| 20 | MDM5      | 4193           | CTCAGCCATCAACTTCTAGTA  | TRCN0000003380 |
| 21 | IKB1      | 8518           | GCGTCAAATATCACGTCATTT  | TRCN0000037869 |
| 22 | IKB2      | 8518           | CCCAAAGAATATCTTCCATTT  | TRCN0000037870 |
| 23 | IKB3      | 8518           | CGGTTCTAGGTCCCAATTCTA  | TRCN0000037871 |
| 24 | IKB4      | 8518           | GCCAGATATTTAAGTACCTTT  | TRCN0000037872 |
| 25 | IKB5      | 8518           | GCTGTGCTCTTGCTGTTAGAA  | TRCN0000037873 |
| 26 | TRIM1     | 9830           | GCCCGTCAAGAGCTTCTTTAA  | TRCN0000061828 |
| 27 | TRIM2     | 9830           | GCGATCGCTATTGCTGAAATA  | TRCN0000061829 |

|    |        |                      |                        |                |
|----|--------|----------------------|------------------------|----------------|
| 28 | TRIM3  | 9830                 | GCTAATGCAGAGTCAAGTAAA  | TRCN0000061830 |
| 29 | TRIM4  | 9830                 | GCCATTGGACATTTCGCCTTAA | TRCN0000061831 |
| 30 | TRIM5  | 9830                 | CTCAGATTACTACTTGACGAA  | TRCN0000061832 |
| 31 | MLANA1 | 2315                 | GCCAGAGGTAATGTTAGTAAA  | TRCN0000128356 |
| 32 | MLANA2 | 2315                 | GCTTATGAGAACTCTCTGCA   | TRCN0000129054 |
| 33 | MLANA3 | 2315                 | CGCCACTATGCCTGACTAATT  | TRCN0000128101 |
| 34 | MLANA4 | 2315                 | CAAAGTGTCTCTTCAAGAGAA  | TRCN0000129699 |
| 35 | MLANA5 | 2315                 | CCAGAAATTGGTAGAAGGATT  | TRCN0000128521 |
| 36 | MTYL1  | 23040                | CCGATATGATTAACACTCAGAA | TRCN0000020864 |
| 37 | MTYL2  | 23040                | CCTCGTTTGAATACAACAGTT  | TRCN0000020865 |
| 38 | MTYL3  | 23040                | CGAAAGCCATTTGCCGTGAAA  | TRCN0000020866 |
| 39 | MTYL4  | 23040                | GCAGCAAGACAGTAGAAATAT  | TRCN0000020867 |
| 40 | MTYL5  | 23040                | CCATCGCTTTGGAAACGGAAA  | TRCN0000020868 |
| 41 | FOS1   | 2355                 | GCAGTGAGTATTGGAAGACTT  | TRCN0000016138 |
| 42 | FOS2   | 2355                 | CAGCAGAAATTCCGGGTAGAT  | TRCN0000016139 |
| 43 | FOS3   | 2355                 | GCGCTCTGTCATCAAGCCCAT  | TRCN0000016140 |
| 44 | FOS4   | 2355                 | CACCTCCATGTCCAACCCATA  | TRCN0000016141 |
| 45 | FOS5   | 2355                 | CACGGCCAGTGTGCAAGATT   | TRCN0000016142 |
| 46 | MB1    | 4151                 | CCAGAGACTCTGGAGAAGTTT  | TRCN0000059283 |
| 47 | MB2    | 4151                 | ACCTGGAGTTCATCTCGGAAT  | TRCN0000059284 |
| 48 | MB3    | 4151                 | GAAGGCGTCTGAGGACTTAAA  | TRCN0000059285 |
| 49 | MB4    | 4151                 | GCATCATGAGGCAGAGATTAA  | TRCN0000059286 |
| 50 | EDN1   | 1908                 | CCTTGATGTTTGTGACAAGAA  | TRCN0000117872 |
| 51 | EDN2   | 1908                 | GTTGAAGTCAAGGACCAACAA  | TRCN0000117873 |
| 52 | EDN3   | 1908                 | ACAAGGAGTGTGTCTACTATT  | TRCN0000117874 |
| 53 | EDN4   | 1908                 | GTAATTCAAGGACGGCAGAAA  | TRCN0000117875 |
| 54 | EDN5   | 1908                 | CCTATGGACTGTCCA ACTACA | TRCN0000117876 |
| 55 | UMP1   | 7372                 | CAGATGCTTTAGGACCTAGTA  | TRCN0000034816 |
| 56 | UMP2   | 7372                 | CGTCTGTAGAAGGAACTATT   | TRCN0000034814 |
| 57 | UMP3   | 7372                 | GAAGCGTATTTGAGTAGACTT  | TRCN0000034815 |
| 58 | UMP4   | 7372                 | GCCTTATACAGCTTTGCCATT  | TRCN0000034817 |
| 59 | UMP5   | 7372                 | CAGTACAATAGCCCACAAGAA  | TRCN0000034818 |
| 60 | FAM1   | 54478                | CCCACCCATTACGGCGATCAA  | TRCN0000062588 |
| 61 | FAM2   | 54478                | CTGTCCCAAGAGCTAGATGAA  | TRCN0000062589 |
| 62 | FAM3   | 54478                | TCGCTCAGCTAAGAGTGCTTT  | TRCN0000062590 |
| 63 | FAM4   | 54478                | CCTGCCAAAGTGGCACCAAGT  | TRCN0000062591 |
| 64 | FAM5   | 54478                | GACATCGTCTCTCATTTCAT   | TRCN0000062592 |
| 65 | ZNF1   | 7776                 | CGACACACTTACCGCATCAAT  | TRCN0000005504 |
| 66 | ZNF2   | 7776                 | CGTCCCTATATGTGTCCCTAT  | TRCN0000005505 |
| 67 | ZNF3   | 7776                 | CCCTGTGTGTAACAAGAAATT  | TRCN0000005506 |
| 68 | ZNF4   | 7776                 | GCTAACTTGGTTGGACCAAAT  | TRCN0000005507 |
| 69 | ZNF5   | 7776                 | CCAATCCTCATAACTGACTTA  | TRCN0000005508 |
| 70 | STM1   | 11075                | GAACTCCAGGTTGAACTGTCT  | TRCN0000140472 |
| 71 | STM2   | 11075                | GTCACTGATCTGCTCTTGCTT  | TRCN0000140630 |
| 72 | STM3   | 11075                | GTGAGGCTAATCTAGCTGCTA  | TRCN0000140826 |
| 73 | STM4   | 11075                | CAAATCAACAAACGTGCCTCT  | TRCN0000141246 |
| 74 | STM5   | 11075                | GCTGAAACAATTGGCAGAGAA  | TRCN0000141795 |
| 75 | GFP1   | clonotechGfp_228s1cl | CGACCACATGAAGCAGCACGA  | TRCN0000072179 |
| 76 | GFP2   | clonotechGfp_437s1cl | ACAACAGCCACAACGTCTATA  | TRCN0000072181 |
| 77 | GFP3   | clonotechGfp_587s1cl | TGCCCGACAACCACTACCTGA  | TRCN0000072186 |
| 78 | RFP1   | rfp_402s1cl          | CGTAATGCAGAAGAAGACCAT  | TRCN0000072210 |

|    |         |             |                        |                |
|----|---------|-------------|------------------------|----------------|
| 79 | RFP2    | rfp_576s1e1 | CTACAAGACCGACATCAAGCT  | TRCN0000072219 |
| 80 | RAN     | 5901        | ACGTCATTTGACTGGTGAATT  | TRCN0000047929 |
| 81 | EFTUD2  | 9343        | GCTTTGCTGAAACGCCTAATA  | TRCN0000074655 |
| 82 | PRPF8   | 10594       | CCCAACTTGTACCGCTACATA  | TRCN0000075108 |
| 83 | WBP11   | 51729       | GCTTCCATTGTCAGGGTATTT  | TRCN0000074473 |
| 84 | PSMB2   | 5690        | CGCACTCTTGATAAATGGTTA  | TRCN0000003907 |
| 85 | RPL9    | 6133        | GACTTCAATCACATCAATGTA  | TRCN0000117564 |
| 86 | PRPF38A | 84950       | CCTTGACTGTATTCAAACCTTA | TRCN0000074908 |
| 87 | PSMD8   | 5707        | GCATCATCATTCTGAAGGATA  | TRCN0000058107 |
| 88 | RPL32   | 6161        | GCTGATGTGCAACAAATCTTA  | TRCN0000007955 |
| 89 | HNRNPC  | 3183        | GCGCTTGTCTAAGATCAAATT  | TRCN0000006644 |
| 90 | CDK11B  | 984         | CGGCCTCAAGCATGAGTATTT  | TRCN0000006209 |
| 91 | AQR     | 9716        | CGTGCAGATGTTACCATAAAT  | TRCN0000074872 |
| 92 | SF3A1   | 10291       | CGTACTGACATCTTCGGTGTA  | TRCN0000006600 |
| 93 | PSMA1   | 5682        | CTGCTGATGCTAGACTGTTAT  | TRCN0000003872 |
| 94 | SNRPD2  | 6633        | CATCAACTGCCGCAACAATAA  | TRCN0000074400 |
| 95 | PSMD1   | 5707        | GCATCATCATTCTGAAGGATA  | TRCN0000058107 |
| 96 | SNRPD1  | 6632        | CCTAAGGTGAAATCTAAGAAA  | TRCN0000005381 |
| 97 | RPS29   | 6161        | GCTGATGTGCAACAAATCTTA  | TRCN0000007955 |
| 98 | RPS14   | 6208        | GCTGAAGGAGAGAATGTATTT  | TRCN0000008641 |

**Table 2. Ranking hairpin enrichment based on GARP scores**

| H460 |        |             | H358 |        |              |
|------|--------|-------------|------|--------|--------------|
| Rank | Gene   | GARP Scores | Rank | Genes  | GARP Scores  |
| 1    | MLANA  | 0.068       | 1    | STMN2  | 0.040011799  |
| 2    | MYT1L  | 0.062       | 2    | FOSL2  | 0.009834825  |
| 3    | TRIM14 | 0.037       | 3    | TRIM14 | -0.007691474 |
| 4    | STMN2  | 0.029       | 4    | ZNF236 | -0.009782804 |
| 5    | ZNF236 | -0.080      | 5    | MLANA  | -0.013716136 |
| 6    | IKBKAP | -0.108      | 6    | FAM64A | -0.013994348 |
| 7    | MDM2   | -0.116      | 7    | MYT1L  | -0.015844925 |
| 8    | FOSL2  | -0.119      | 8    | ATP1B1 | -0.050984448 |
| 9    | L1CAM  | -0.124      | 9    | IKBKAP | -0.074913897 |
| 10   | EDN3   | -0.157      | 10   | MDM2   | -0.076451096 |
| 11   | HEXIM1 | -0.159      | 11   | UMPS   | -0.115507228 |
| 12   | ATP1B1 | -0.211      | 12   | EDN3   | -0.11876518  |
| 13   | FAM64A | -0.234      | 13   | L1CAM  | -0.141716081 |
| 14   | UMPS   | -0.281      | 14   | HEXIM1 | -0.205186881 |
| 15   | MB     | -0.288      | 15   | MB     | -0.212918085 |

**Supplemental Table 3. Prognostic value of *TRIM14* expression compared with other clinical and pathologic variables.**

| Variables                   | Multivariate Survival Analysis |           |         |
|-----------------------------|--------------------------------|-----------|---------|
|                             | HR                             | 95% CI    | P-value |
| <b>JBR.10<sup>4</sup></b>   |                                |           |         |
| <i>TRIM14</i> expression    | 0.23                           | 0.08-0.66 | 0.006   |
| Stage III vs. II vs. I      | 2.07                           | 0.91-4.72 | 0.025   |
| Histology (Others vs. ADC)  | 1.01                           | 0.56-1.84 | 0.962   |
| Sex (female vs. male)       | 0.86                           | 0.28-2.58 | 0.785   |
| Age ≥65 years               | 2.45                           | 1.00-5.96 | 0.049   |
| <b>DCC<sup>5</sup></b>      |                                |           |         |
| <i>TRIM14</i> expression    | 0.61                           | 0.40-0.95 | 0.030   |
| Stage III vs. II vs. I      | 2.19                           | 1.74-2.76 | <0.0001 |
| Histology (others vs. ADC)  | -                              | -         | -       |
| Sex (female vs. male)       | 0.78                           | 0.51-1.18 | 0.241   |
| Age ≥65 years               | 1.03                           | 0.70-1.54 | 0.870   |
| <b>Michigan<sup>6</sup></b> |                                |           |         |
| <i>TRIM14</i> expression    | 1.19                           | 0.49-2.89 | 0.706   |
| Stage III vs. II vs. I      | 1.13                           | 0.75-1.70 | 0.564   |
| Histology (others vs. ADC)  | -                              | -         | -       |
| Sex (female vs. male)       | 1.16                           | 0.60-2.22 | 0.662   |
| Age ≥65 years               | 0.91                           | 0.48-1.71 | 0.766   |
| <b>UHN<sup>7</sup></b>      |                                |           |         |
| <i>TRIM14</i> expression    | 1.41                           | 0.93-2.14 | 0.111   |
| Stage III vs. II vs. I      | 1.64                           | 0.94-2.85 | 0.081   |
| Histology (others vs. ADC)  | 0.66                           | 0.35-1.26 | 0.209   |
| Sex (female vs. male)       | 0.48                           | 0.27-0.84 | 0.010   |
| Age ≥65 years               | 1.66                           | 0.89-3.10 | 0.112   |

Abbreviations: HR, hazard ratio; CI, confidence interval

**Supplemental Table 4. Mutational status of human cell line models.**

| Model | Type | MDM2 | TP53       | EGFR         | KRAS | BRAF  |
|-------|------|------|------------|--------------|------|-------|
| H3255 | ADC  | n/a  | WT         | L858R        | G13C | WT    |
| H1395 | ADC  | Amp  | WT         | WT           | WT   | G469A |
| H157  | SQC  | n/a  | c.892G>T   | WT           | G12R | WT    |
| H1650 | ADC  | n/a  | c.673-2A>G | E746 A750del | WT   | WT    |
| H358  | ADC  | n/a  | Deletion   | WT           | G12V | WT    |

**Supplemental Table 5. Functional annotation of top TRIM14 binding candidates**

| GO Term                                                                                                   | Count | %  | Enrichment | P-value |
|-----------------------------------------------------------------------------------------------------------|-------|----|------------|---------|
| GO:0031398~positive regulation of protein ubiquitination                                                  | 10    | 14 | 28         | 5.3E-11 |
| GO:0006511~ubiquitin-dependent protein catabolic process                                                  | 13    | 19 | 13         | 2.3E-10 |
| GO:0031396~regulation of protein ubiquitination                                                           | 10    | 14 | 24         | 2.6E-10 |
| GO:0051437~positive regulation of ubiquitin-protein ligase activity during mitotic cell cycle             | 9     | 13 | 31         | 3.1E-10 |
| GO:0051443~positive regulation of ubiquitin-protein ligase activity                                       | 9     | 13 | 31         | 4.0E-10 |
| GO:0051439~regulation of ubiquitin-protein ligase activity during mitotic cell cycle                      | 9     | 13 | 30         | 4.5E-10 |
| GO:0051351~positive regulation of ligase activity                                                         | 9     | 13 | 29         | 5.6E-10 |
| GO:0051438~regulation of ubiquitin-protein ligase activity                                                | 9     | 13 | 27         | 9.6E-10 |
| GO:0051340~regulation of ligase activity                                                                  | 9     | 13 | 26         | 1.3E-09 |
| GO:0031145~anaphase-promoting complex-dependent proteasomal ubiquitin-dependent protein catabolic process | 8     | 11 | 29         | 8.2E-09 |
| GO:0051436~negative regulation of ubiquitin-protein ligase activity during mitotic cell cycle             | 8     | 11 | 29         | 8.2E-09 |
| GO:0010498~proteasomal protein catabolic process                                                          | 9     | 13 | 21         | 8.3E-09 |
| GO:0043161~proteasomal ubiquitin-dependent protein catabolic process                                      | 9     | 13 | 21         | 8.3E-09 |
| GO:0051444~negative regulation of ubiquitin-protein ligase activity                                       | 8     | 11 | 28         | 1.0E-08 |
| GO:0051352~negative regulation of ligase activity                                                         | 8     | 11 | 28         | 1.0E-08 |
| GO:0031397~negative regulation of protein ubiquitination                                                  | 8     | 11 | 26         | 2.1E-08 |
| GO:0000278~mitotic cell cycle                                                                             | 13    | 19 | 8          | 2.8E-08 |
| GO:0019941~modification-dependent protein catabolic process                                               | 15    | 21 | 6          | 5.9E-08 |
| GO:0043632~modification-dependent macromolecule catabolic process                                         | 15    | 21 | 6          | 5.9E-08 |
| GO:0031401~positive regulation of protein modification process                                            | 10    | 14 | 13         | 6.6E-08 |
| GO:0051603~proteolysis involved in cellular protein catabolic process                                     | 15    | 21 | 6          | 1.0E-07 |
| GO:0044257~cellular protein catabolic process                                                             | 15    | 21 | 6          | 1.1E-07 |
| GO:0044265~cellular macromolecule catabolic process                                                       | 16    | 23 | 5          | 1.6E-07 |
| GO:0030163~protein catabolic process                                                                      | 15    | 21 | 6          | 1.6E-07 |
| GO:0009057~macromolecule catabolic process                                                                | 16    | 23 | 5          | 4.1E-07 |
| GO:0032270~positive regulation of cellular protein metabolic process                                      | 10    | 14 | 10         | 4.3E-07 |
| GO:0031400~negative regulation of protein modification process                                            | 8     | 11 | 16         | 5.5E-07 |
| GO:0051247~positive regulation of protein metabolic process                                               | 10    | 14 | 10         | 6.1E-07 |
| GO:0022402~cell cycle process                                                                             | 13    | 19 | 5          | 2.6E-06 |
| GO:0031399~regulation of protein modification process                                                     | 10    | 14 | 8          | 3.0E-06 |
| GO:0032268~regulation of cellular protein metabolic process                                               | 12    | 17 | 6          | 3.1E-06 |
| GO:0006457~protein folding                                                                                | 8     | 11 | 11         | 7.9E-06 |
| GO:0032269~negative regulation of cellular protein metabolic process                                      | 8     | 11 | 11         | 8.8E-06 |
| GO:0051248~negative regulation of protein metabolic process                                               | 8     | 11 | 10         | 1.1E-05 |
| GO:0007049~cell cycle                                                                                     | 14    | 20 | 4          | 1.3E-05 |
| GO:0051258~protein polymerization                                                                         | 5     | 7  | 24         | 4.9E-05 |

|                                                                   |    |    |    |         |
|-------------------------------------------------------------------|----|----|----|---------|
| GO:0044092~negative regulation of molecular function              | 9  | 13 | 6  | 6.4E-05 |
| GO:0006508~proteolysis                                            | 15 | 21 | 3  | 7.3E-05 |
| GO:0043086~negative regulation of catalytic activity              | 8  | 11 | 7  | 1.4E-04 |
| GO:0010604~positive regulation of macromolecule metabolic process | 13 | 19 | 4  | 1.6E-04 |
| GO:0043085~positive regulation of catalytic activity              | 10 | 14 | 5  | 2.6E-04 |
| GO:0043623~cellular protein complex assembly                      | 6  | 9  | 9  | 5.4E-04 |
| GO:0044093~positive regulation of molecular function              | 10 | 14 | 4  | 6.2E-04 |
| GO:0007018~microtubule-based movement                             | 5  | 7  | 11 | 1.2E-03 |
| GO:0034622~cellular macromolecular complex assembly               | 7  | 10 | 5  | 1.9E-03 |
| GO:0034621~cellular macromolecular complex subunit organization   | 7  | 10 | 5  | 3.5E-03 |
| GO:0006974~response to DNA damage stimulus                        | 7  | 10 | 4  | 4.3E-03 |
| GO:0006461~protein complex assembly                               | 8  | 11 | 4  | 4.6E-03 |
| GO:0070271~protein complex biogenesis                             | 8  | 11 | 4  | 4.6E-03 |
| GO:0030261~chromosome condensation                                | 3  | 4  | 28 | 4.8E-03 |
| GO:0065003~macromolecular complex assembly                        | 9  | 13 | 3  | 5.8E-03 |
| GO:0043933~macromolecular complex subunit organization            | 9  | 13 | 3  | 8.4E-03 |
| GO:0033554~cellular response to stress                            | 8  | 11 | 3  | 8.5E-03 |
| GO:0006323~DNA packaging                                          | 4  | 6  | 8  | 1.3E-02 |
| GO:0012501~programmed cell death                                  | 8  | 11 | 3  | 1.3E-02 |
| GO:0051276~chromosome organization                                | 7  | 10 | 3  | 1.5E-02 |
| GO:0007017~microtubule-based process                              | 5  | 7  | 5  | 2.1E-02 |
| GO:0008219~cell death                                             | 8  | 11 | 3  | 2.8E-02 |
| GO:0016265~death                                                  | 8  | 11 | 3  | 2.9E-02 |
| GO:0006281~DNA repair                                             | 5  | 7  | 4  | 3.0E-02 |
| GO:0010605~negative regulation of macromolecule metabolic process | 8  | 11 | 3  | 3.1E-02 |
| GO:0043065~positive regulation of apoptosis                       | 6  | 9  | 3  | 3.2E-02 |
| GO:0043068~positive regulation of programmed cell death           | 6  | 9  | 3  | 3.3E-02 |
| GO:0010942~positive regulation of cell death                      | 6  | 9  | 3  | 3.4E-02 |
| GO:0006915~apoptosis                                              | 7  | 10 | 3  | 3.7E-02 |
| GO:0006917~induction of apoptosis                                 | 5  | 7  | 4  | 4.3E-02 |
| GO:0012502~induction of programmed cell death                     | 5  | 7  | 4  | 4.4E-02 |
| GO:0042981~regulation of apoptosis                                | 8  | 11 | 2  | 4.7E-02 |
| GO:0043067~regulation of programmed cell death                    | 8  | 11 | 2  | 4.9E-02 |
| GO:0010941~regulation of cell death                               | 8  | 11 | 2  | 5.0E-02 |



**Supplemental Table 6.** Authentications of human cell lines by short tandem repeat (STR) DNA profiling analysis.

| <b>H157</b>       |          |          |
|-------------------|----------|----------|
| <b>Amelogenin</b> | <b>X</b> | <b>X</b> |
| CSF1PO            | 12       | 12       |
| D13S317           | 12       | 12       |
| D16S539           | 12       | 13       |
| D18S51            | 13       | 15       |
| D19S433           | 11       | 13       |
| D21S11            | 32       | 32       |
| D2S1338           | 21       | 22       |
| D3S1358           | 17       | 18       |
| D5S818            | 10       | 13       |
| D7S820            | 12       | 12       |
| FGA               | 22       | 23       |
| THO1              | 7        | 9        |
| TPOX              | 6        | 12       |
| vWA               | 15       | 15       |

| <b>H1650</b>      |          |          |
|-------------------|----------|----------|
| <b>Amelogenin</b> | <b>X</b> | <b>X</b> |
| CSF1PO            | 11       | 11       |
| D13S317           | 11       | 11       |
| D16S539           | 11       | 12       |
| D18S51            | 10       | 10       |
| D19S433           | 15       | 15       |
| D21S11            | 30       | 30       |
| D2S1338           | 19       | 19       |
| D3S1358           | 18       | 18       |
| D5S818            | 11       | 11       |
| D7S820            | 8        | 9        |
| D8S1179           | 12       | 12       |
| FGA               | 20       | 20       |
| THO1              | 9.3      | 9.3      |
| TPOX              | 11       | 11       |
| vWA               | 18       | 18       |

| <b>H520</b>       |          |          |
|-------------------|----------|----------|
| <b>Amelogenin</b> | <b>X</b> | <b>X</b> |
| CSF1PO            | 10       | 10       |
| D13S317           | 10       | 11       |
| D16S539           | 8        | 13       |
| D18S51            | 17       | 17       |
| D19S433           | 13       | 14       |
| D21S11            | 30       | 30       |
| D2S1338           | 18       | 23       |
| D3S1358           | 16       | 16       |
| D5S818            | 12       | 13       |
| D7S820            | 8        | 12       |
| D8S1179           | 14       | 15       |
| FGA               | 22       | 22       |
| THO1              | 10       | 10       |
| TPOX              | 8        | 8        |
| vWA               | 18       | 19       |

| <b>H3255</b>      |          |          |
|-------------------|----------|----------|
| <b>Amelogenin</b> | <b>X</b> | <b>X</b> |
| CSF1PO            | 11       | 14       |
| D13S317           | 11       | 13       |
| D16S539           | 8        | 8        |
| D18S51            | 12       | 12       |
| D19S433           | 14       | 15       |
| D21S11            | 28       | 28       |
| D2S1338           | 17       | 19       |
| D3S1358           | 14       | 18       |
| D5S818            | 11       | 12       |
| D7S820            | 10       | 13       |
| D8S1179           | 13       | 13       |
| FGA               | 23       | 25       |
| THO1              | 6        | 6        |
| TPOX              | 8        | 11       |
| vWA               | 16       | 16       |

| <b>H460</b>       |          |          |
|-------------------|----------|----------|
| <b>Amelogenin</b> | <b>X</b> | <b>Y</b> |
| CSF1PO            | 11       | 12       |
| D13S317           | 13       | 13       |
| D16S539           | 9        | 9        |
| D18S51            | 13       | 15       |
| D19S433           | 14       | 14       |
| D21S11            | 30       | 30       |
| D2S1338           | 17       | 25       |
| D3S1358           | 15       | 18       |
| D5S818            | 9        | 10       |
| D7S820            | 9        | 12       |
| D8S1179           | 12       | 12       |
| FGA               | 21       | 23       |
| THO1              | 9.3      | 9.3      |
| TPOX              | 8        | 8        |
| vWA               | 17       | 17       |

## Supplemental Figures

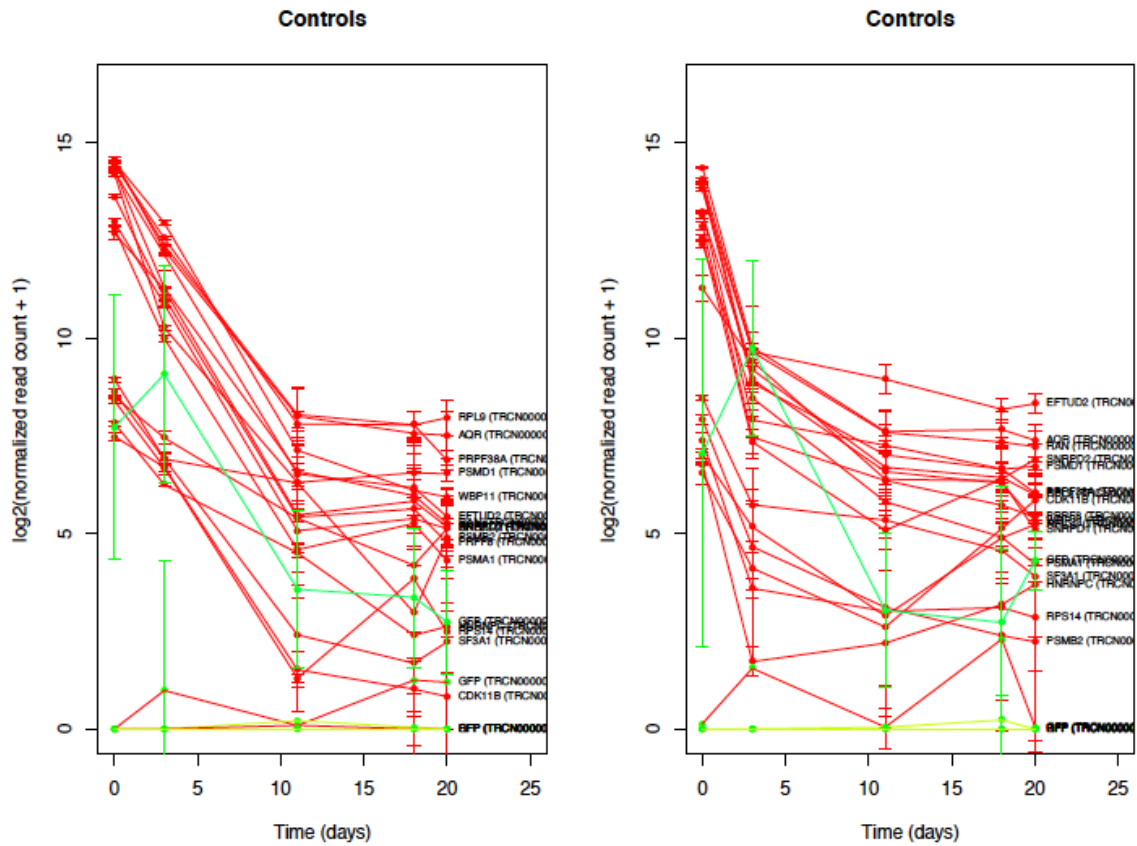

**Supplemental Figure 1.** Depletion of all 19 control hairpins essential for cell survival over time validates the screen's functionality.

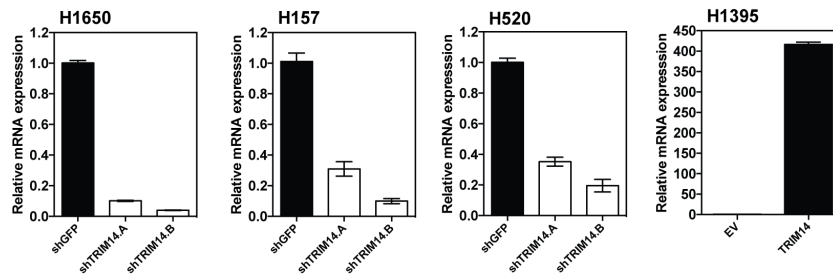

**Supplemental Figure 2.** Relative mRNA levels of *TRIM14* in isogenic cell lines. RT-qPCR was used to confirm that mRNA levels for *TRIM14* were reduced in shRNA infected cells compared to controls.

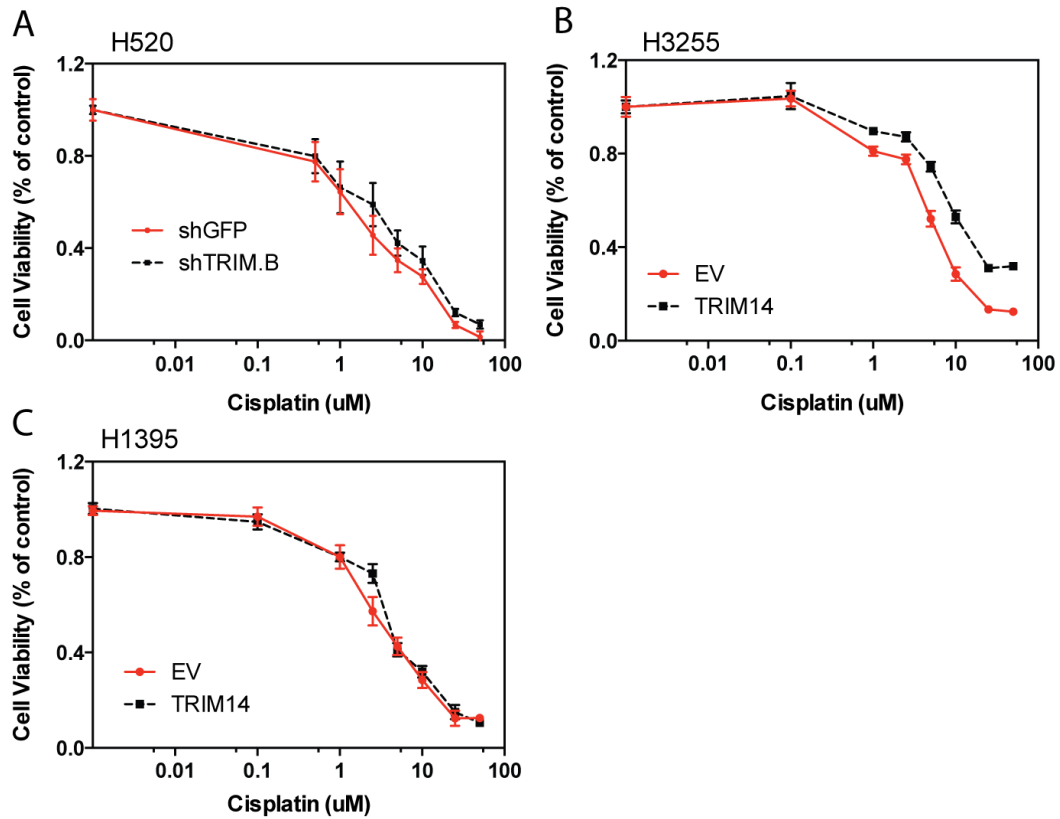

**Supplemental Figure 3. TRIM14 expression does not alter the sensitivity of cell lines to cisplatin.**

(A-C) NSCLC cell lines were treated with serial dilutions of cisplatin for 48 hours and cell viability was measured by MTS assays. Control cell lines are labeled red. Results shown represent more than three biological replicates.

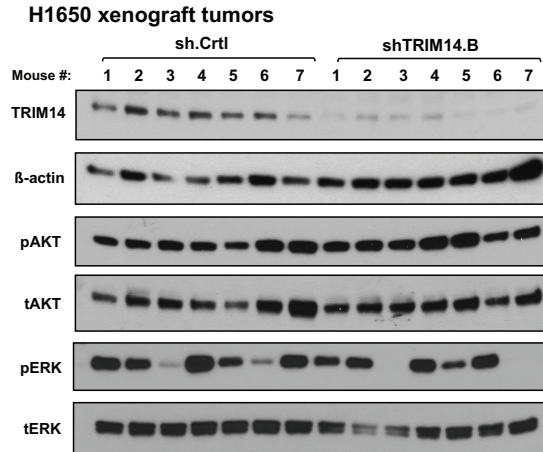

**Supplemental Figure 4. TRIM14 suppression in NSCLC cells has no effect on canonical proliferative MAPK or AKT pathways *in vivo*.**

Total protein extracts from H1650 xenograft tumours were subjected to Western blot analysis using indicated antibodies and compared with control cell lines. β-actin was used as a loading control.

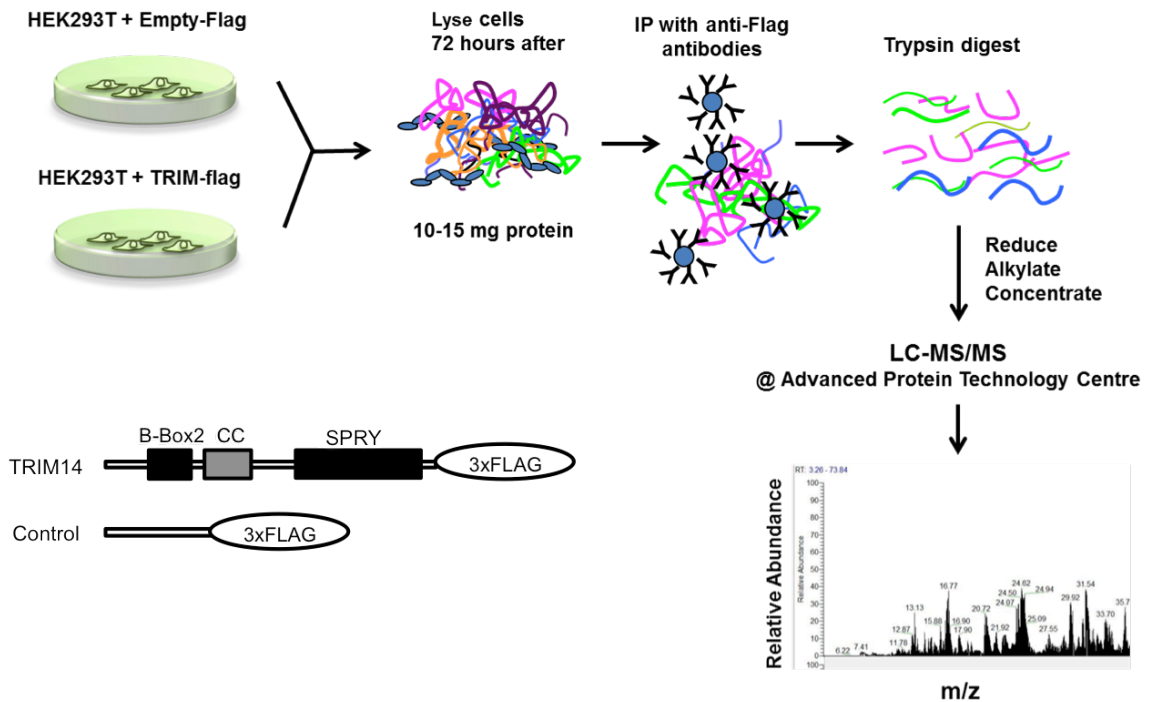

**Supplemental Figure 5. Schematic diagram illustrates the experimental design to identify novel binding partners of TRIM14 using mass spectrometry.**

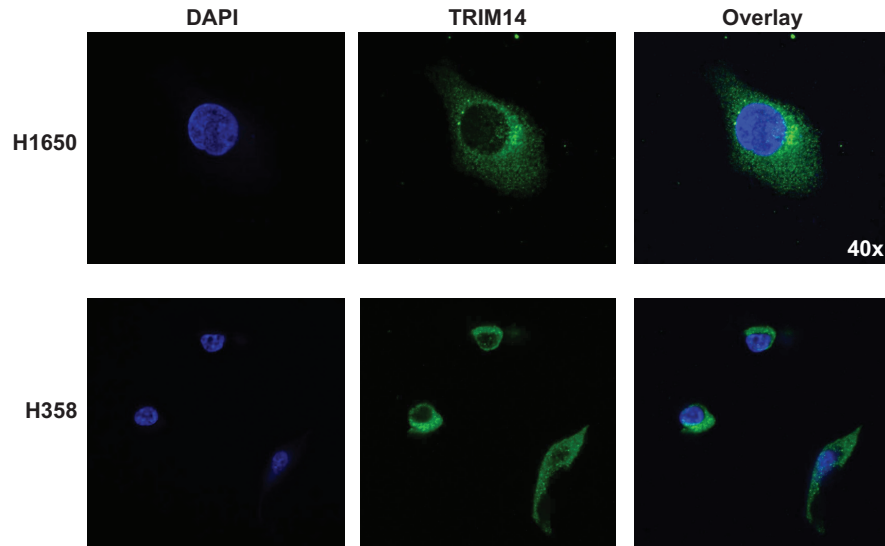

**Supplemental Figure 6. TRIM14 is predominantly localized to the cytosol in NSCLC cells.** Confocal microscopy visualization of endogenous TRIM14 (green) in H1650 (A) and H358 (B) reveals localization in the cytosol. DAPI (blue) was used to visualize nucleus structures.

**Supplemental Figure 6. Uncropped original western blots for Figures 1 and 2.**

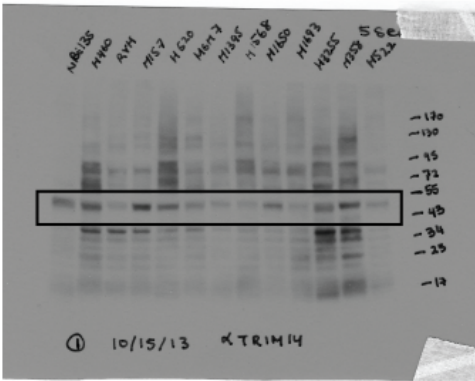

Figure 1b: TRIM14

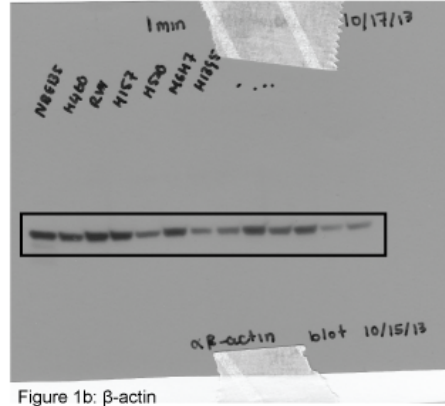

Figure 1b: β-actin

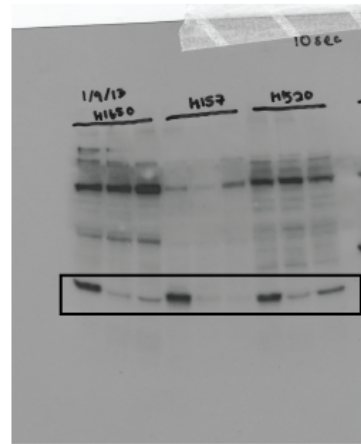

Figure 1c: TRIM14

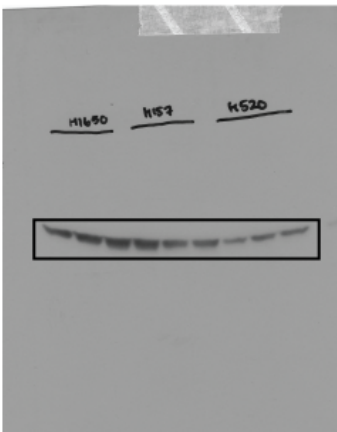

Figure 1c: β-actin

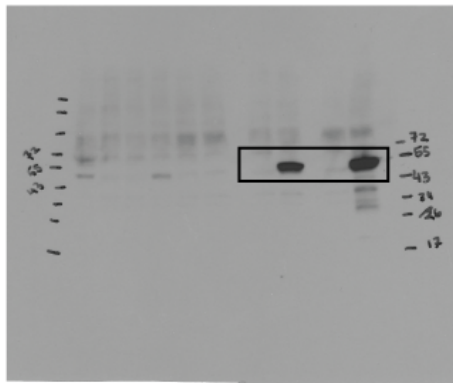

Figure 1c: TRIM14

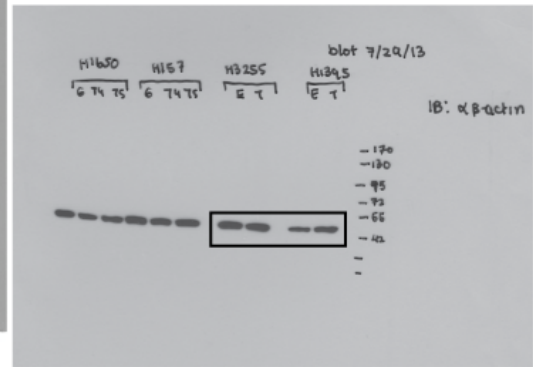

Figure 1c: β-actin

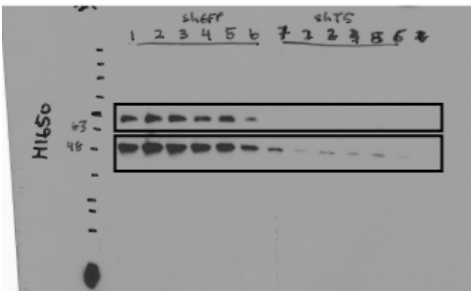

Figure 2c: AIF and TRIM14

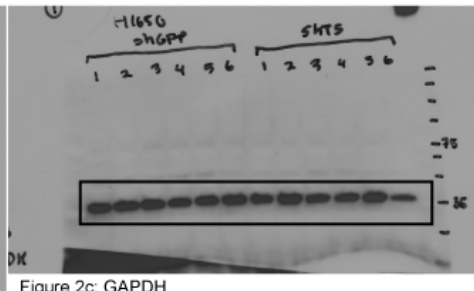

Figure 2c: GAPDH

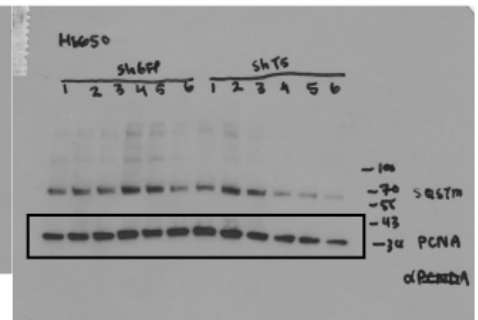

Figure 2c: PCNA

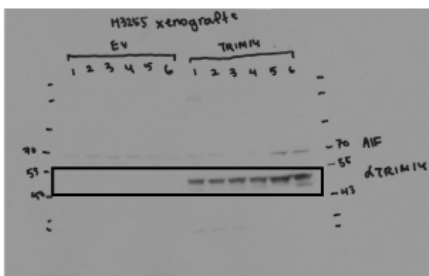

Figure 2c: AIF and TRIM14

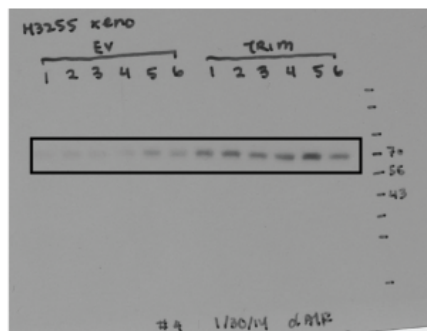

Figure 2c: AIF

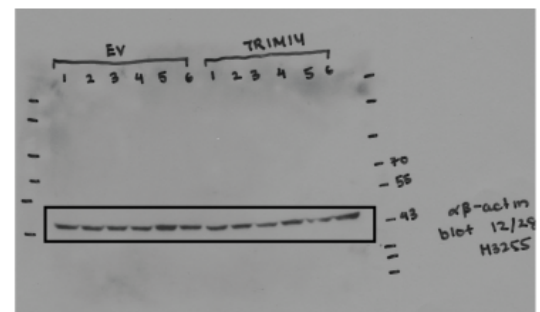

Figure 2c: β-actin

**Supplemental Figure 7. Uncropped original western blots for Figures 4 and 5.**

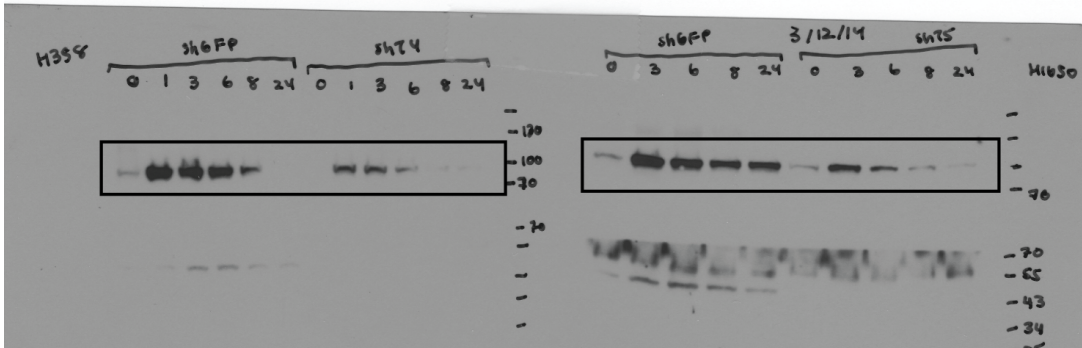

Figure 4E: p-STAT1 Y701

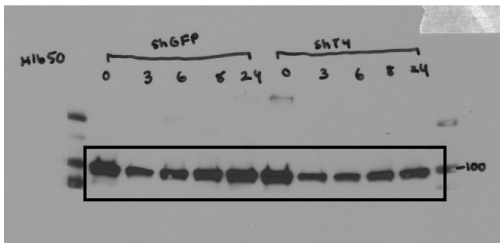

Figure 4E: total STAT1

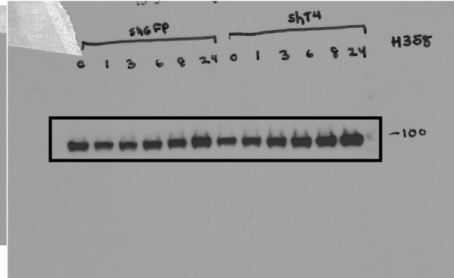

Figure 4E: total STAT1

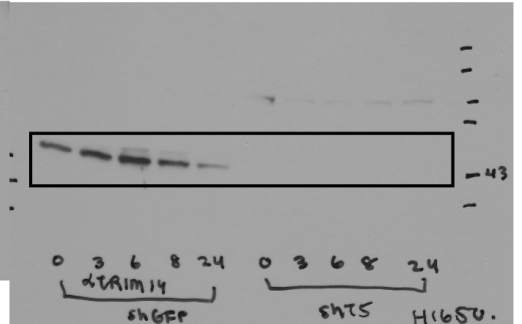

Figure 4E: TRIM14

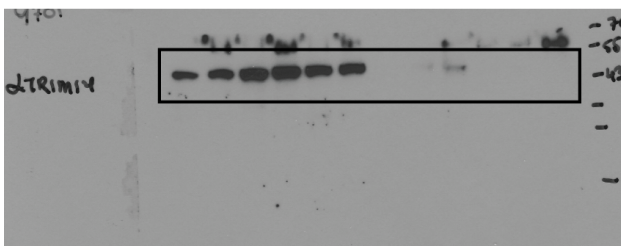

Figure 4E: TRIM14

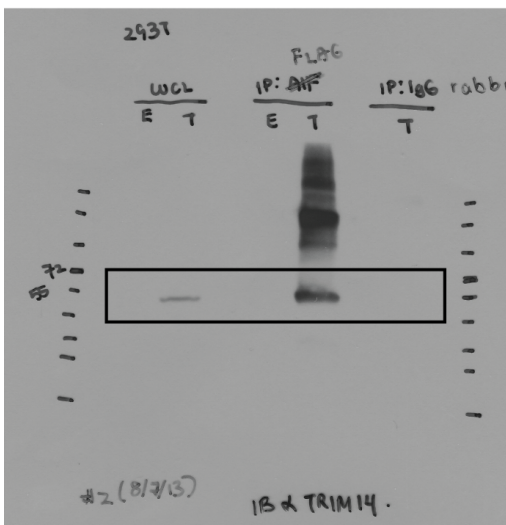

Figure 4E: TRIM14

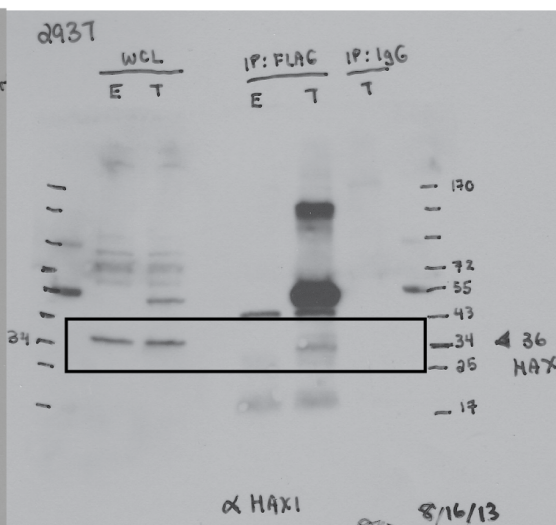

Figure 4E: HAX1

**Supplemental Figure 8. Uncropped original western blots for Figure 5.**

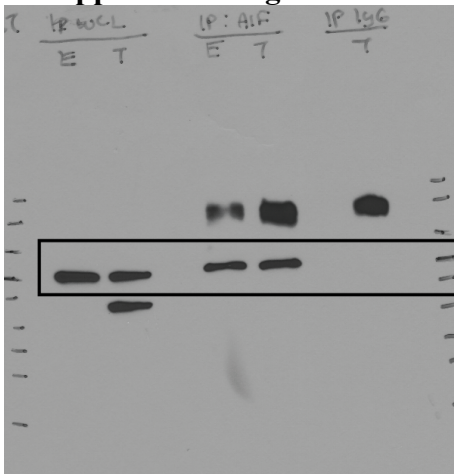

Figure 5B: AIF

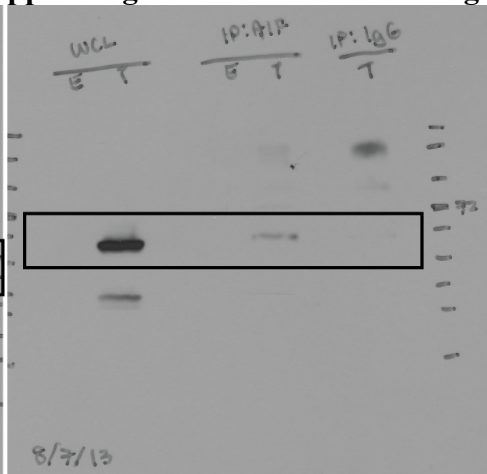

Figure 5B: FLAG

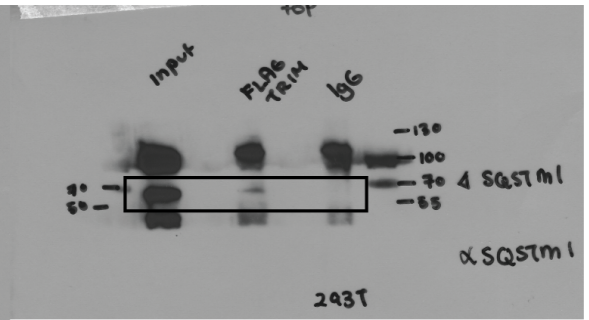

Figure 5C: p62

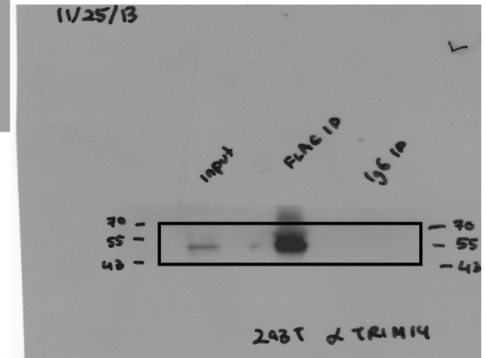

Figure 5C: TRIM14

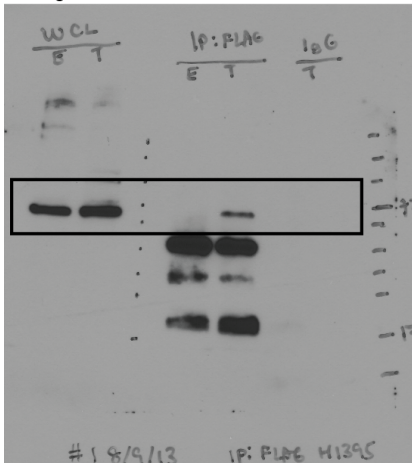

Figure 5D: p62

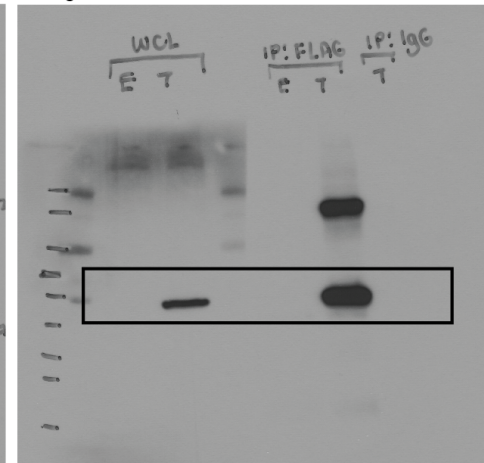

Figure 5D: TRIM14

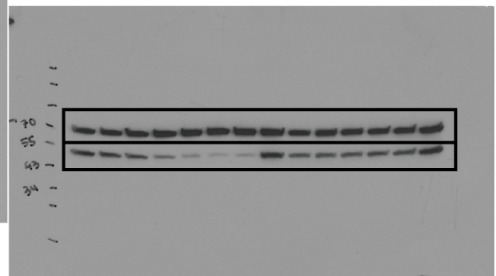

Figure 5D: HSP70 and TRIM14

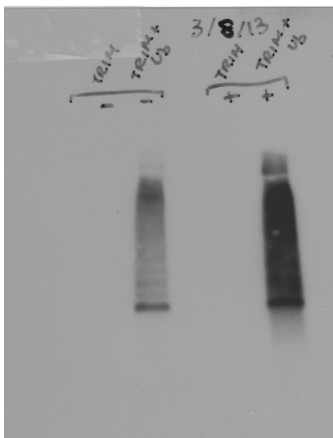

Figure 5F: HA

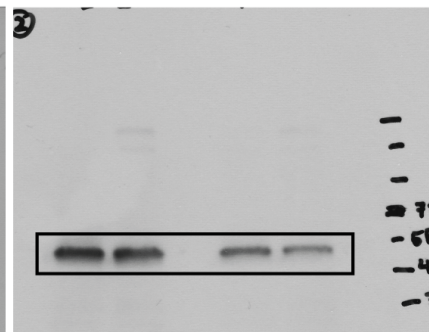

Figure 5F: FLAG

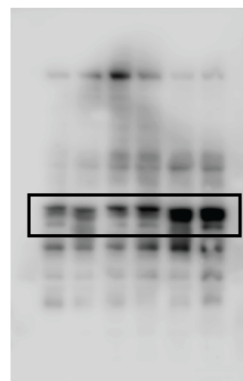

Figure 5H: TRIM14

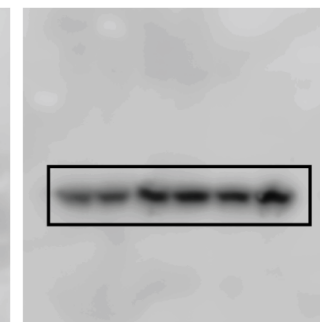

Figure 5H:  $\beta$ -actin



## Supplemental References

- 1 Zhu, C. Q. *et al.* Prognostic and predictive gene signature for adjuvant chemotherapy in resected non-small-cell lung cancer. *J Clin Oncol* **28**, 4417-4424, doi:10.1200/jco.2009.26.4325 (2010).
- 2 Marcotte, R. *et al.* Essential gene profiles in breast, pancreatic, and ovarian cancer cells. *Cancer discovery* **2**, 172-189, doi:10.1158/2159-8290.cd-11-0224 (2012).
- 3 Keller, A., Nesvizhskii, A. I., Kolker, E. & Aebersold, R. Empirical statistical model to estimate the accuracy of peptide identifications made by MS/MS and database search. *Anal. Chem.* **74**, 5383-5392 (2002).
- 4 Winton, T. *et al.* Vinorelbine plus cisplatin vs. observation in resected non-small-cell lung cancer. *N Engl J Med* **352**, 2589-2597, doi:10.1056/NEJMoa043623 (2005).
- 5 Shedden, K. *et al.* Gene expression-based survival prediction in lung adenocarcinoma: a multi-site, blinded validation study. *Nat Med* **14**, 822-827, doi:10.1038/nm.1790 (2008).
- 6 Raponi, M. *et al.* Gene expression signatures for predicting prognosis of squamous cell and adenocarcinomas of the lung. *Cancer Res* **66**, 7466-7472, doi:10.1158/0008-5472.can-06-1191 (2006).
- 7 Der, S. D. *et al.* Validation of a histology-independent prognostic gene signature for early-stage, non-small-cell lung cancer including stage IA patients. *J Thorac Oncol* **9**, 59-64, doi:10.1097/jto.0000000000000042 (2014).
